# Supplementary material for: Adaptation and Validation of a Questionnaire to Evaluate Knowledge of the Low Phe Diet in PKU
Source: MDPI journal article supplement (doi:10.3390/nu13082719), 2021-08-07
Supplement: s1 [file s1]

# PKU

Questionnaire  
to Evaluate  
Knowledge  
of the  
Low Phe Diet

Child's first name: Last name: Age: Sex: Date: Responsible  
for evaluating: 

Child has:

Classic PKU: ☐Moderate PKU: ☐Mild PKU: ☐**Questionnaire Correction Sheet****WRONG ANSWER= NO POINTS - RIGHT ANSWER= 1 POINT**

Subject's answer: X (in disallowed food, red ink)= 1 POINT

Subject's answer: EMPTY (in allowed food, black ink)= 1 POINT

**Brief Questionnaire**

| FACTOR | Point |                         |
|--------|-------|-------------------------|
| 1      |       | 1- Pepper               |
| 1      |       | 2- Pineapple            |
| 2      |       | 3- Diet coke            |
| 3      |       | 4- Broccoli             |
| 1      |       | 5- Canned fruit         |
| 2      |       | 6- Nachos               |
| 3      |       | 7- Rice                 |
| 3      |       | 8- French fries         |
| 3      |       | 9- Roasted Potatoes     |
| 2      |       | 10- Flour               |
| 1      |       | 11- Ketchup             |
| 1      |       | 12- Onion               |
| 1      |       | 13- Lettuce             |
| 2      |       | 14- Kidney Beans        |
| 1      |       | 15- Syrup               |
| 3      |       | 16- Coconut             |
| 3      |       | 17- Green peas          |
| 3      |       | 18- Avocado             |
| 2      |       | 19- Sunflower seeds     |
| 1      |       | 20- Pickles             |
| 2      |       | 21- Granola type cereal |
| 2      |       | 22- Hot chocolate mix   |
| 1      |       | 23- Orange              |
| 1      |       | 24- Watermelon          |
| 3      |       | 25- Roasted corn        |
| 2      |       | 26- Hazelnuts           |
| 1      |       | 27- Fresh orange juice  |
| 2      |       | 28- Beef Bouillon       |
| 1      |       | 29- Melon               |
| 3      |       | 30- Artichoke           |
| 2      |       | 31- Egg White           |
| 1      |       | 32- Kiwi                |
| 3      |       | 33- Dark Chocolate      |
| 3      |       | 34- Banana              |
| 1      |       | 35- Olives              |
| 1      |       | 36- Plum                |

TOTAL POINTS FACTOR 1 = \_\_\_\_\_  
 TOTAL POINTS FACTOR 2 = \_\_\_\_\_  
 TOTAL POINTS FACTOR 3 = \_\_\_\_\_

**Part 2 - Optional**

| ALLOWED OR<br>DISALLOWED | Point |                       |
|--------------------------|-------|-----------------------|
| 4                        |       | 37- Mustard           |
| 4                        |       | 38- Cornstarch        |
| 4                        |       | 39- Margarine         |
| 5                        |       | 40- Herring           |
| 5                        |       | 41- Cow's Milk        |
| 5                        |       | 42- Shrimp            |
| 5                        |       | 43- Almonds           |
| 4                        |       | 44- Butter            |
| 4                        |       | 45- Olive Oil         |
| 4                        |       | 46- Sugar             |
| 5                        |       | 47- Cashews           |
| 4                        |       | 48- Vinegar           |
| 4                        |       | 49- Honey             |
| 5                        |       | 50- Cheese            |
| 4                        |       | 51- Coke              |
| 5                        |       | 52- Yogurt            |
| 5                        |       | 53- Canned tuna       |
| 4                        |       | 54- Sugary beverages  |
| 4                        |       | 55- Baking powder     |
| 4                        |       | 56- Saccharin         |
| 4                        |       | 57- Cocoa butter      |
| 5                        |       | 58- Egg               |
| 5                        |       | 59- Sugarless gum     |
| 5                        |       | 60- Walnut            |
| 5                        |       | 61- Sausage           |
| 5                        |       | 62- Soybean           |
| 4                        |       | 63- Eggplant          |
| 5                        |       | 64- Surimi, crab meat |
| 5                        |       | 65- Mushrooms, white  |
| 4                        |       | 66- Chamomile tea     |
| 5                        |       | 67- Pistachios        |
| 4                        |       | 68- Mayonnaise no egg |
| 4                        |       | 69- Cinnamon          |
| 4                        |       | 70- Pumpkin           |
| 5                        |       | 71- Peanuts           |
| 5                        |       | 72- Mussels           |
| 5                        |       | 73- Chicken           |
| 5                        |       | 74- Chips             |
| 4                        |       | 75- Sparkling water   |
| 5                        |       | 76- Chickpeas         |
| 5                        |       | 77- Whole-wheat bread |
| 4                        |       | 78- Zucchini          |
| 5                        |       | 79- Lobster           |
| 4                        |       | 80- Tea               |

TOTAL POINTS (4) ALLOWED FOOD= \_\_\_\_\_  
 TOTAL POINTS (5) LIMITED/FORBIDDEN FOOD= \_\_\_\_\_
