# Supplementary material for: Adaptation and Validation of a Questionnaire to Evaluate Knowledge of the Low Phe Diet in PKU
Source: MDPI journal article supplement (doi:10.3390/nu13082719), 2021-08-07
Supplement: s1 [file s1]

# PKU

Questionnaire  
to Evaluate  
Knowledge  
of the  
Low Phe Diet

Child's first name: Last name: Age:  Sex:  Date: Responsible  
for evaluating: 

Child has:

Classic PKU: ☐Moderate PKU: ☐Mild PKU: ☐

The PHE information comes from the **USDA's National Nutrient Database for Standard Reference**. There may be differences in the amount of PHE in foods between countries. This is due to the variety of the food analyzed, since the one that is most commonly consumed is taken as a reference for the questionnaire.

| Mg of PHE | Brief Questionnaire     |
|-----------|-------------------------|
| 4         | 1- Pepper               |
| 21        | 2- Pineapple            |
| Aspartame | 3- Diet coke            |
| 84        | 4- Broccoli             |
| 45        | 5- Canned fruit         |
| 229       | 6- Nachos               |
| 381       | 7- Rice                 |
| 95        | 8- French fries         |
| 72        | 9- Roasted Potatoes     |
| 520       | 10- Flour               |
| 41        | 11- Ketchup             |
| 25        | 12- Onion               |
| 17        | 13- Lettuce             |
| 824       | 14- Kidney Beans        |
| 0         | 15- Syrup               |
| 180       | 16- Coconut             |
| 200       | 17- Green peas          |
| 232       | 18- Avocado             |
| 992       | 19- Sunflower seeds     |
| 17        | 20- Pickles             |
| 431       | 21- Granola type cereal |
| 150       | 22- Hot chocolate mix   |
| 31        | 23- Orange              |
| 15        | 24- Watermelon          |
| 203       | 25- Roasted corn        |
| 663       | 26- Hazelnuts           |
| 9         | 27- Fresh orange juice  |
| 800       | 28- Beef Bouillon       |
| 23        | 29- Melon               |
| 155       | 30- Artichoke           |
| 686       | 31- Egg White           |
| 44        | 32- Kiwi                |
| 390       | 33- Dark Chocolate      |
| 110       | 34- Banana              |
| 29        | 35- Olives              |
| 14        | 36- Plum                |

| Mg of PHE | Part 2                |
|-----------|-----------------------|
| 21        | 37- Mustard           |
| 13        | 38- Cornstarch        |
| 6         | 39- Margarine         |
| 701       | 40- Herring           |
| 147       | 41- Cow's Milk        |
| 858       | 42- Shrimp            |
| 1646      | 43- Almonds           |
| 41        | 44- Butter            |
| 0         | 45- Olive Oil         |
| 0         | 46- Sugar             |
| 1435      | 47- Cashews           |
| 0         | 48- Vinegar           |
| 11        | 49- Honey             |
| 1260      | 50- Cheese            |
| 0         | 51- Coke              |
| 302       | 52- Yogurt            |
| 1036      | 53- Canned tuna       |
| 0         | 54- Sugary beverages  |
| 0         | 55- Baking powder     |
| 0         | 56- Saccharin         |
| 0         | 57- Cocoa butter      |
| 681       | 58- Egg               |
| Aspartame | 59- Sugarless gum     |
| 711       | 60- Walnut            |
| 405       | 61- Sausage           |
| 2346      | 62- Soybean           |
| 43        | 63- Eggplant          |
| 260       | 64- Surimi, crab meat |
| 85        | 65- Mushrooms, White  |
| 0         | 66- Chamomile tea     |
| 711       | 67- Pistachios        |
| 45        | 68- Mayonnaise no egg |
| 0         | 69- Cinnamon          |
| 32        | 70- Pumpkin           |
| 953       | 71- Peanuts           |
| 426       | 72- Mussels           |
| 1294      | 73- Chicken           |
| 310       | 74- Chips             |
| 0         | 75- Sparkling water   |
| 1034      | 76- Chickpeas         |
| 387       | 77- Whole-wheat bread |
| 43        | 78- Zucchini          |
| 782       | 79- Lobster           |
| 0         | 80- Tea               |
