# Supplementary material for: Adaptation and Validation of a Questionnaire to Evaluate Knowledge of the Low Phe Diet in PKU
Source: MDPI journal article supplement (doi:10.3390/nu13082719), 2021-08-07
Supplement: s1 [file s1]

## Questionnaire to evaluate the knowledge of low PHE diet

### *Factorial structure of the brief PKU questionnaire*

| <b>Factor 1:<br/>Allowed foods</b> | <b>Factor 2:<br/>Forbidden foods,<br/>easy to recognize</b> | <b>Factor 3:<br/>Limited foods, NOT<br/>easy to recognize</b> |
|------------------------------------|-------------------------------------------------------------|---------------------------------------------------------------|
| 1. Pepper                          | 1. Diet coke                                                | 1. Broccoli                                                   |
| 2. Pineapple                       | 2. Nachos                                                   | 2. Rice                                                       |
| 3. Canned fruit                    | 3. Flour                                                    | 3. French fries                                               |
| 4. Ketchup                         | 4. Kidney Beans                                             | 4. Roasted potatoes                                           |
| 5. Onion                           | 5. Sunflower seeds                                          | 5. Coconut                                                    |
| 6. Lettuce                         | 6. Granola type<br>cereal                                   | 6. Green peas                                                 |
| 7. Syrup                           | 7. Hot chocolate<br>mix                                     | 7. Roasted Corn                                               |
| 8. Pickles                         | 8. Hazelnuts                                                | 8. Avocado                                                    |
| 9. Orange                          | 9. Beef Bouillon                                            | 9. Artichoke                                                  |
| 10. Watermelon                     | 10. Egg White                                               | 10. Dark Chocolate                                            |
| 11. Fresh orange<br>juice          |                                                             | 11. Banana                                                    |
| 12. Melon                          |                                                             |                                                               |
| 13. Kiwi                           |                                                             |                                                               |
| 14. Olives                         |                                                             |                                                               |
| 15. Plum                           |                                                             |                                                               |

### *Additional items of the PKU questionnaire (full version)*

| <b>Group 4:<br/>Allowed food</b> | <b>Group 5:<br/>Limited and Forbidden food</b> |
|----------------------------------|------------------------------------------------|
| 1. Mustard                       | 1. Herring                                     |
| 2. Cornstarch                    | 2. Cow's Milk                                  |
| 3. Margarine                     | 3. Shrimp                                      |
| 4. Butter                        | 4. Almonds                                     |
| 5. Olive Oil                     | 5. Cashews                                     |
| 6. Sugar                         | 6. Cheese                                      |
| 7. Vinegar                       | 7. Yogurt                                      |
| 8. Honey                         | 8. Canned tuna                                 |
| 9. Coke                          | 9. Egg                                         |
| 10. Sugary beverages             | 10. Sugarless gum                              |
| 11. Baking powder                | 11. Walnut                                     |
| 12. Saccharin                    | 12. Sausage                                    |
| 13. Cocoa butter                 | 13. Soybean                                    |
| 14. Eggplant                     | 14. Surimi, crab meat                          |
| 15. Chamomile tea                | 15. Mushrooms, white                           |
| 16. Mayonnaise no egg            | 16. Peanuts                                    |
| 17. Cinnamon                     | 17. Mussels                                    |
| 18. Pumpkin                      | 18. Chicken                                    |
| 19. Sparkling water              | 19. Chips                                      |
| 20. Zucchini                     | 20. Pistachios                                 |
| 21. Tea                          | 21. Chickpeas                                  |
|                                  | 22. Whole-wheat bread                          |
|                                  | 23. Lobster                                    |
