# Supplementary material for: Adaptation and Validation of a Questionnaire to Evaluate Knowledge of the Low Phe Diet in PKU
Source: MDPI journal article supplement (doi:10.3390/nu13082719), 2021-08-07
Supplement: s1 [file s1]

## Questionnaire to evaluate the knowledge of low PHE diet

### Psychometric Tables: Percentile Score and Standard (S)-Scores

You can obtain an S-Score for factors 1, 2 and 3 with the brief questionnaire. If the subject answered the second part of the questionnaire, it is also possible to calculate a percentile score. The total raw score used to calculate the percentile score is the sum of the total points of the three factors plus the total points obtained from the Allowed and Forbidden/Limited Foods.

**Total Raw Score "General Knowledge PKU Diet"**=Total points factor 1+Total points factor 2+Total points factor 3+Total points Allowed food + Total points Limited/Forbidden food.

Description of values obtained in the percentile score and S-Scores:

|  |                             |
|--|-----------------------------|
|  | Very low level of knowledge |
|  | Low level of knowledge      |
|  | Medium of knowledge         |
|  | High of knowledge           |

| Total Raw Score | S-Score                  |                                                |                                                    |  | Percentile                    |  | Total Raw Score |
|-----------------|--------------------------|------------------------------------------------|----------------------------------------------------|--|-------------------------------|--|-----------------|
|                 | Factor 1<br>Allowed food | Factor 2<br>Forbidden foods, easy to recognize | Factor 3<br>Forbidden foods, NOT easy to recognize |  | GENERAL KNOWLEDGE<br>PKU DIET |  |                 |
| 0               | 30                       | 0                                              | 15                                                 |  | 1                             |  | 0               |
| 1               | 35                       | 0                                              | 20                                                 |  | 1                             |  | 1               |
| 2               | 40                       | 0                                              | 30                                                 |  | 1                             |  | 2               |
| 3               | 45                       | 10                                             | 35                                                 |  | 1                             |  | 3               |
| 4               | 50                       | 20                                             | 40                                                 |  | 1                             |  | 4               |
| 5               | 55                       | 30                                             | 50                                                 |  | 1                             |  | 5               |
| 6               | 60                       | 40                                             | 55                                                 |  | 1                             |  | 6               |
| 7               | 65                       | 50                                             | 60                                                 |  | 1                             |  | 7               |
| 8               | 70                       | 60                                             | 65                                                 |  | 2                             |  | 8               |
| 9               | 75                       | 75                                             | 70                                                 |  | 2                             |  | 9               |
| 10              | 80                       | 85                                             | 80                                                 |  | 3                             |  | 10              |
| 11              | 83                       |                                                | 90                                                 |  | 3                             |  | 11              |
| 12              | 90                       |                                                |                                                    |  | 3                             |  | 12              |
| 13              | 93                       |                                                |                                                    |  | 4                             |  | 13              |
| 14              | 97                       |                                                |                                                    |  | 4                             |  | 14              |
| 15              | 100                      |                                                |                                                    |  | 5                             |  | 15              |
| 30              |                          |                                                |                                                    |  | 5                             |  | 30              |
| 33              |                          |                                                |                                                    |  | 10                            |  | 33              |
| 35              |                          |                                                |                                                    |  | 15                            |  | 35              |
| 38              |                          |                                                |                                                    |  | 20                            |  | 38              |
| 39              |                          |                                                |                                                    |  | 25                            |  | 39              |
| 40              |                          |                                                |                                                    |  | 30                            |  | 40              |
| 41              |                          |                                                |                                                    |  | 35                            |  | 41              |
| 42              |                          |                                                |                                                    |  | 40                            |  | 42              |
| 43              |                          |                                                |                                                    |  | 45                            |  | 43              |
| 45              |                          |                                                |                                                    |  | 50                            |  | 45              |
| 46              |                          |                                                |                                                    |  | 55                            |  | 46              |
| 47              |                          |                                                |                                                    |  | 60                            |  | 47              |
| 48              |                          |                                                |                                                    |  | 65                            |  | 48              |
| 51              |                          |                                                |                                                    |  | 70                            |  | 51              |
| 53              |                          |                                                |                                                    |  | 75                            |  | 53              |
| 57              |                          |                                                |                                                    |  | 80                            |  | 57              |
| 60              |                          |                                                |                                                    |  | 85                            |  | 60              |
| 65              |                          |                                                |                                                    |  | 90                            |  | 65              |
| 67              |                          |                                                |                                                    |  | 95                            |  | 67              |
| 73              |                          |                                                |                                                    |  | 99                            |  | 73              |
| >73             |                          |                                                |                                                    |  | 100                           |  | >73             |
