# Supplementary material for: Adaptation and Validation of a Questionnaire to Evaluate Knowledge of the Low Phe Diet in PKU
Source: MDPI journal article supplement (doi:10.3390/nu13082719), 2021-08-07
Supplement: s1 [file s1]

Child's first name:

Last name:

Age:  Sex:  Date:

Responsible for evaluating:

Child has:

Classic PKU: ☐

Moderate PKU: ☐

Mild PKU: ☐

## Calculating the subject's scores

|                                                  | RAW Score                            |                                      | S Score | Assessment<br>Very Low/ Low/<br>Medium/ High |
|--------------------------------------------------|--------------------------------------|--------------------------------------|---------|----------------------------------------------|
|                                                  | Number of<br>Right Items<br>(max.15) | Number of<br>Wrong Items<br>(max.15) |         |                                              |
| FACTOR 1<br>Allowed food                         |                                      |                                      |         |                                              |
| FACTOR 2<br>Forbidden foods, easy to recognize   |                                      |                                      |         |                                              |
| FACTOR 3<br>Limited foods, NOT easy to recognize |                                      |                                      |         |                                              |
| GENERAL KNOWLEDGE<br>PKU DIET                    |                                      |                                      |         |                                              |

## Subjects Profile

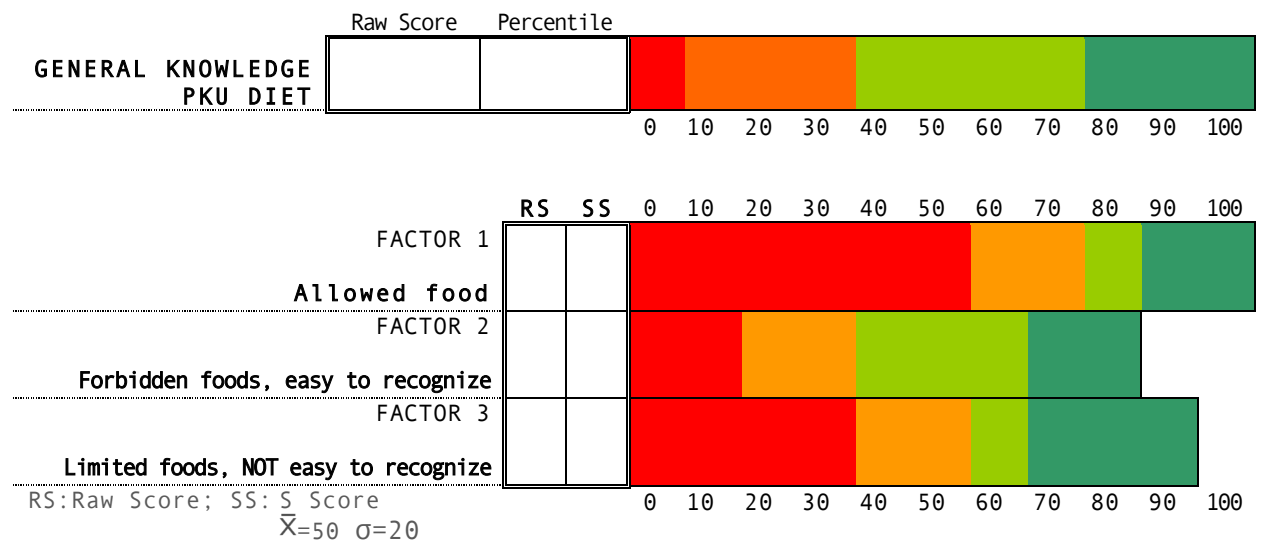

## Assessment and Recommendations
