# Supplementary material for: Adaptation and Validation of a Questionnaire to Evaluate Knowledge of the Low Phe Diet in PKU
Source: MDPI journal article supplement (doi:10.3390/nu13082719), 2021-08-07
Supplement: s1 [file s1]

Archive with 6 entries (6 files):
- supplementary material/Page 1.pdf
- supplementary material/Page 2.pdf
- supplementary material/Page 3.pdf
- supplementary material/Page 4.pdf
- supplementary material/Page 5.pdf
- supplementary material/Page 6.pdf
